# Supplementary material for: Association study of six candidate genes with major depressive disorder in the North-Western population of Pakistan
Source: PLoS One. 2021 Aug 19;16(8):e0248454. doi: 10.1371/journal.pone.0248454 (PMC8376078; doi:10.1371/journal.pone.0248454)
Supplement: S4 Table — (XLSX) [file pone.0248454.s004.xlsx]

## Sheet: Sheet1
Question.1
A= Healthy/Normal=p
G= Deasesd=q
Diseased	No,s	Control	No,s
AA	21	AA	17
AG	46	AG	10
GG	18	GG	13
Total	85	Total	40
Traits	Dis.	Con.	Obs	Exp	(O - E)	(O - E)²	(O - E)²/E
AA	21	17	38	35	3	9	0.257143
AG	46	10	56	62	-6	36	0.580645
GG	18	13	31	28	3	9	0.321429
			125			Chi,value	1.15922
		P,value	0.560118
p	76	p	56		p2	0.278784
	56		62		2pq	0.498432
	132		118		q2	0.222784
	250		250			1
	0.528		0.472
Allele frequency
Diseased	No,s	Control	No,s
A	88	A	44
G	82	G	36
Traits	Dis.	Con.	Obs	Exp	(O - E)	(O - E)²	(O - E)²/E
A	88	44	132	125	7	49	0.392
G	82	36	118	125	-7	49	0.392
			250			chivalue	0.784
p	132			P value	0.375921
	118
	250
	500
	0.5

## Sheet: Sheet2
Question.2
A= Healthy/Normal=p
C= Deasesd=q
Diseased	No,s	Control	No,s
AA	25	AA	11
AC	15	AC	9
CC	10	CC	10
Total	50	Total	30
Traits	Dis.	Con.	Obs	Exp	(O - E)	(O - E)²	(O - E)²/E
AA	25	11	36	29	7	49	1.68966
AC	15	9	24	38	-14	196	5.15789
CC	10	10	20	13	7	49	3.76923
			80			Chi,value	10.6168
		p,value	0.00494989
p	72	q	24	p2	0.36
	24		40	2pq	0.48
	96		64	q2	0.16
	160		160		1
	0.6		0.4
Allele Frequency
Diseased	No,s	Control	No,s
A	65	A	31
C	35	C	29
Traits	Dis.	Con.	Obs	Exp	(O - E)	(O - E)²	(O - E)²/E
A	65	31	96	80	16	256	3.2
C	35	29	64	80	-16	256	3.2
						ChiS Value	6.4
p	96				P value	0.011412
	64
	160
	320
	0.5

## Sheet: Sheet3
Question.3
A= Healthy/Normal=p
G= Deasesd=q
Diseased	No,s	Control	No,s
AA	32	AA	23
AG	26	AG	12
GG	17	GG	15
Total	75	Total	50
Traits	Dis.	Con.	Obs	Exp	(O - E)	(O - E)²	(O - E)²/E
AA	32	23	55	44	11	121	2.75
AG	26	12	38	60	-22	484	8.06667
GG	17	15	32	21	11	121	5.7619
			125			Chi,value	16.5786
			P,value	0.000251194
p	110	q	38	p2	0.350464
	38		64	2pq	0.483072
	148		102	q2	0.166464
	250		250		1
	0.592		0.408
Allele Frequency
Diseased	No,s	Control	No,s
A	90	A	58
G	60	G	42
Traits	Dis.	Con.	Obs	Exp	(O - E)	(O - E)²	(O - E)²/E
A	90	58	148	125	23	529	4.232
G	60	42	102	125	-23	529	4.232
						ChiS value	8.464
p	148			P Value	0.00362244
	102
	250
	500
	0.5

## Sheet: Sheet4
Question.4
A= Healthy/Normal=p
G= Deasesd=q
Diseased	No,s	Control	No,s
AA	25	AA	13
AG	12	AG	11
GG	13	GG	8
Total	50	Total	32
Traits	Dis.	Con.	Obs	Exp	(O - E)	(O - E)²	(O - E)²/E
AA	25	13	38	30	8	64	2.13333
AG	12	11	23	39	-16	256	6.5641
GG	13	8	21	13	8	64	4.92308
			82			Chi,value	13.6205
				P,value	0.00110241
p	76	q	23	p2	0.364404
	23		42	2pq	0.47851
	99		65	q2	0.157087
	164		164		1
	0.603659		0.396341
Allele frequency
Diseased	No,s	Control	No,s
A	62	A	37
G	38	G	27
Traits	Dis.	Con.	Obs	Exp	(O - E)	(O - E)²	(O - E)²/E
A	62	37	99	82	17	289	3.52439
G	38	27	65	82	-17	289	3.52439
						chi,s value	7.04878
p	99				p value	0.00793192
	65
	164
	328
	0.5

## Sheet: Sheet5
Question.5
A= Healthy/Normal=p
G= Deasesd=q
Diseased	No,s	Control	No,s
AA	22	AA	15
AG	15	AG	8
GG	13	GG	7
Total	50	Total	30
Traits	Dis.	Con.	Obs	Exp	(O - E)	(O - E)²	(O - E)²/E
AA	22	15	37	29	8	64	2.2069
AG	15	8	23	38	-15	225	5.92105
GG	13	7	20	12	8	64	5.33333
			80			Chi,value	13.4613
				P,value	0.00119377
p	74	q	23		p2	0.367539
	23		40		2pq	0.477422
	97		63		q2	0.155039
	160		160			1
	0.60625		0.39375
Allele frequency
Diseased	No,s	Control	No,s
A	59	A	38
G	41	G	22
Traits	Dis.	Con.	Obs	Exp	(O - E)	(O - E)²	(O - E)²/E
A	59	38	97	80	17	289	3.6125
G	41	22	63	80	-17	289	3.6125
						chis value	7.225
p	97			P value	0.00718952
	63
	160
	320
	0.5

## Sheet: Sheet6
Question.6
G= Healthy/Normal=p
A= Deasesd=q
Diseased	No,s	Control	No,s
GG	53	GG	25
GA	22	GA	15
AA	15	AA	10
Total	90	Total	50
Traits	Dis.	Con.	Obs	Exp	(O - E)	(O - E)²	(O - E)²/E
GG	53	25	78	67	11	121	1.80597
GA	22	15	37	60	-23	529	8.81667
AA	15	10	25	14	11	121	8.64286
			140			Chi,value	19.2655
				6.55467e-05
p	156	q	37		p2	0.475115
	37		50		2pq	0.428342
	193		87		q2	0.0965434
	280		280			1
	0.689286		0.310714
Allele frequency
Diseased	No,s	Control	No,s
G	128	G	65
A	52	A	35
Traits	Dis.	Con.	Obs	Exp	(O - E)	(O - E)²	(O - E)²/E
G	128	65	193	140	53	2809	20.0643
A	52	35	87	140	-53	2809	20.0643
						chis value	40.1286
p	193
	87		2.37786e-10
	280
	560
	0.5

## Sheet: Sheet7
Cases Smaple	Controls samples
85	40
50	30
75	50
50	32
50	30
90	50
Totals
400	232	total	632
